# Supplementary material for: Differential expression of immunoregulatory cytokines in adipose tissue and liver in response to high fat and high sugar diets in female mice
Source: PubMed Central journal article supplement (PMC10655005; doi:10.3389/fnut.2023.1275160), 2023-11-03
Supplement: Data_Sheet_1.pdf [file Data_Sheet_1.pdf]

## Supplementary material

### Differential expression of immuno-regulatory cytokines in adipose tissue and liver in response to high fat and high sugar diets in female mice.

Juliane Weiner, Sebastian Dommel, Claudia Gebhardt, Martha Hanschkow, Yulia Popkova, Kerstin Krause, Nora Klötting, Matthias Blüher, Jürgen Schiller, John T. Heiker

**Supplementary Table 1: Primers used in this study.**

| Gene Name | Forward Primer         | Reverse Primer          |
|-----------|------------------------|-------------------------|
| Acc1      | TACAGGATGGTTTGGCCTTT   | CAAATTCTGCTGGAGAAGCC    |
| Alk7      | CCTTGCGGCAGGACTGAAG    | GACCAAGTCGAGGGGCATTTG   |
| Bmp8b     | TCCACCAACCACGCCACTAT   | CAGTAGGCACACAGCACACCT   |
| Cd36      | TGGAGCTGTTATTGGTGCAG   | TGGGTTTTGCACATCAAAGA    |
| Cox7a1    | AGAAAACCGTGTGGCAGAGA   | CAGCGTCATGGTCAGTCTGT    |
| Cpt1a     | TGGATGGCTATGGTCAAGGT   | TCTCCCTCCTTCATCAGTGG    |
| Fasn      | CTCGCTTGTCGTCTGCCT     | TTGGCCCAGAACTCCTGTAG    |
| Glo1      | CCTGATGACGGGAAAATGAAAG | GCCGTCAGGGTCTTGAATGA    |
| Hsl       | CTGCCAGGATTGGATGGTT    | CGCTGAGGCTTTGATCTTGC    |
| Il1b      | TGCCACCTTTTGACAGTGATG  | AAGGTCCACGGGAAAGACAC    |
| Il6       | ACCTGGAGTACATGAAGAACA  | TTGGAAATTGGGGTAGGAAG    |
| Mcp1      | GCCCCACTCACCTGCTGCTACT | CCTGCTGCTGGTGATCCTCTTGT |
| Pgc1a     | CTTTTGTGGACGGAAGCAAT   | GAGTCTTGGGAAAGGACACG    |
| Pparg     | CGTGAAGCCCATCGAGGACATC | TGGAGCAGGGGGTGAAG       |
| Scd1      | GAGGCCTGTACGGGATCATA   | CAGCCGAGCCTTGTAAGTTC    |
| Tbx1      | GGCAGGCAGACGAATGTTC    | TTGTCATCTACGGGCACAAAG   |
| Tmem26    | AGGGGCTTCCTTAGGGTTTTTC | CCGTCTTGGATGAAGAAGCTG   |
| Ucp1      | CCGAACTGTACAGCGGTCT    | CCGAGAGAGGCAGGTGTTTTC   |

## Supplementary Figure S1

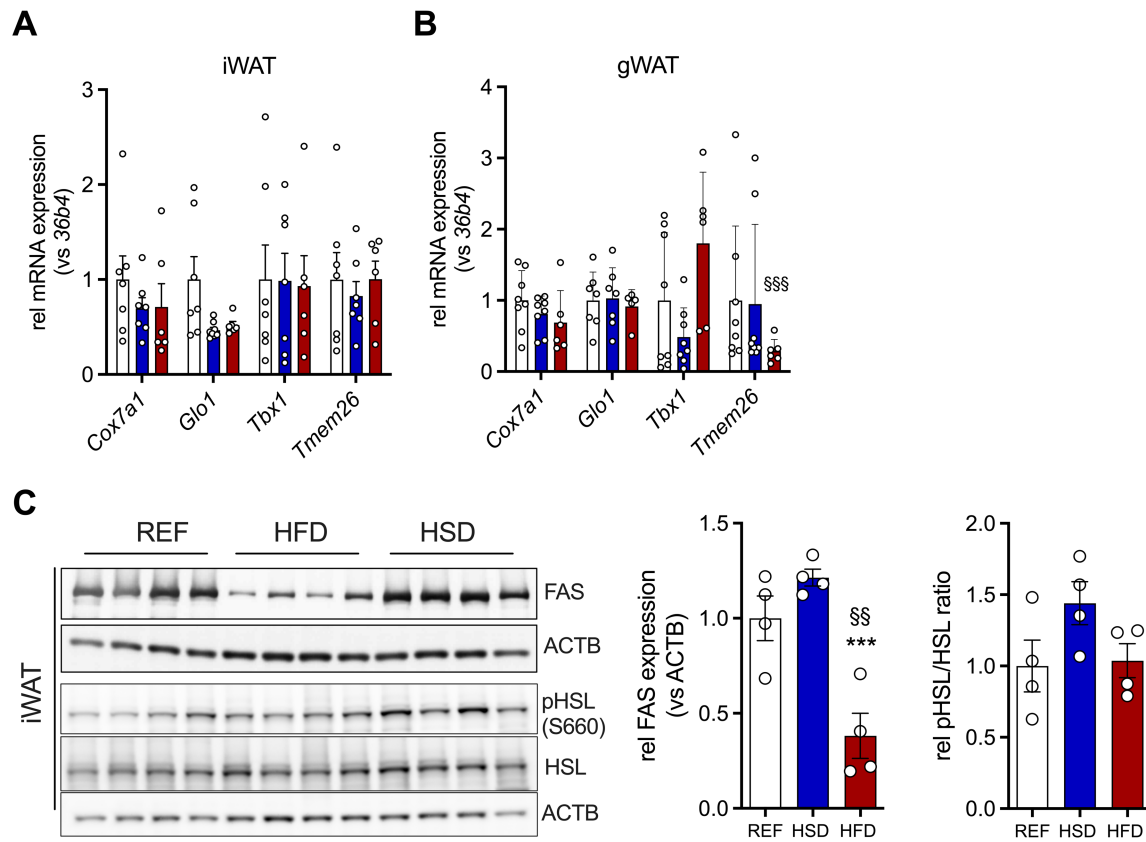

**Supplementary Figure S1. Gene and protein expression in WAT depots in response to twelve weeks of HSD and HFD feeding.** (A, B) The expression of thermogenic genes *Cox7a1*, *Glo1*, *Tbx1* and *Tmem26* in iWAT (A) and gWAT (B) of HFD- and HSD-fed and control mice. (C) Western blot analysis (left) of HSL phosphorylation (pHSL (Ser660) and HSL) as well as FAS expression in iWAT (n=4/group). Densitometric analyses of FAS expression normalized for bActin (middle) and HSL-phosphorylation (right). Color coding for all graphs: black - control diet; blue - HSD, red - HFD. Data are presented as mean  $\pm$  SEM, with N=6-8 mice per group. Statistical significance was tested by 2-way ANOVA with Tukey's (A, B) multiple comparisons test, or by ANOVA with Tukey's (C) multiple comparisons test and is indicated as follows: \*, vs. REF;  $^{\S}$  HSD vs. HFD; \*,  $^{\S}$   $p < 0.05$ ; \*\*,  $^{\S\S}$   $p < 0.01$ ; \*\*\*,  $^{\S\S\S}$   $p < 0.001$ .
